# Supplementary material
Source: PubMed Central journal article supplement (PMC3378966)
Supplement: Supp_Data.pdf [file Supp_Data.pdf]

## Supplementary Data

SUPPLEMENTARY TABLE S1. ASSOCIATIONS AMONG HEMORRHAGIC, ISCHEMIC STROKE, AND NORMAL CONTROLS

| Gene | SNP           | Strokes (n=674) vs. Controls (n=267) |          |         | Hemorrhagic (n=109) vs. Controls (n=267) |          |         | Ischemic (n=565) vs. Controls (n=267) |          |              | Hemorrhagic (n=109) vs. Ischemic (n=565) |          |         |
|------|---------------|--------------------------------------|----------|---------|------------------------------------------|----------|---------|---------------------------------------|----------|--------------|------------------------------------------|----------|---------|
|      |               | MAF                                  |          | p-Value | MAF                                      |          | p-Value | MAF                                   |          | p-Value      | MAF                                      |          | p-Value |
|      |               | Strokes                              | Controls |         | Hemorrhagic                              | Controls |         | Ischemic                              | Controls |              | Hemorrhagic                              | Ischemic |         |
| NPPB | rs198389A/G   | 0.132                                | 0.125    | 0.367   | 0.115                                    | 0.125    | 0.613   | 0.136                                 | 0.125    | 0.197        | 0.115                                    | 0.136    | 0.489   |
|      | rs5227G/T     | 0.000                                | 0.000    | —       | 0.000                                    | 0.000    | —       | 0.000                                 | 0.000    | —            | 0.000                                    | 0.000    | —       |
|      | rs35640285G/T | 0.000                                | 0.000    | —       | 0.000                                    | 0.000    | —       | 0.000                                 | 0.000    | —            | 0.000                                    | 0.000    | —       |
| NPPA | rs61757273G/T | 0.071                                | 0.068    | 0.313   | 0.060                                    | 0.068    | 0.931   | 0.073                                 | 0.068    | 0.132        | 0.060                                    | 0.073    | 0.481   |
|      | rs198373A/G   | 0.007                                | 0.002    | 0.072   | 0.000                                    | 0.002    | —       | 0.008                                 | 0.002    | <b>0.032</b> | 0.000                                    | 0.008    | —       |
|      | rs198372G/A   | 0.007                                | 0.002    | 0.071   | 0.000                                    | 0.002    | —       | 0.008                                 | 0.002    | <b>0.032</b> | 0.000                                    | 0.008    | —       |
|      | rs5063G/A     | 0.094                                | 0.099    | 0.625   | 0.096                                    | 0.099    | 0.880   | 0.093                                 | 0.099    | 0.617        | 0.096                                    | 0.093    | 0.913   |
|      | rs5065T/C     | 0.007                                | 0.006    | 0.779   | 0.009                                    | 0.006    | 0.954   | 0.007                                 | 0.006    | 0.613        | 0.009                                    | 0.007    | 0.674   |
|      | rs5067A/G     | 0.007                                | 0.006    | 0.785   | 0.009                                    | 0.006    | 0.951   | 0.007                                 | 0.006    | 0.619        | 0.009                                    | 0.007    | 0.660   |

Bold value indicates the statistical significance of  $P < 0.05$ .

p-Values of additive model were obtained by logistic analysis adjusted for age, sex, and histories of hypertension and diabetes mellitus as covariables. MAF, minor allele frequency.

SNP, single-nucleotide polymorphism.

SUPPLEMENTARY TABLE S2. ASSOCIATIONS AMONG CARDIOEMBOLISM, LARGE-ARTERY ATHEROSCLEROSIS, AND SMALL-VESSEL OCCLUSION IN ISCHEMIC STROKE

| Gene | SNP           | CE (n=33) vs. LAA (n=123) |       |         | CE (n=33) vs. SVO (n=395) |       |              | LAA (n=123) vs. SVO (n=395) |       |         |
|------|---------------|---------------------------|-------|---------|---------------------------|-------|--------------|-----------------------------|-------|---------|
|      |               | MAF                       |       | p-Value | MAF                       |       | p-Value      | MAF                         |       | p-Value |
|      |               | CE                        | LAA   |         | CE                        | SVO   |              | LAA                         | SVO   |         |
| NPPB | rs198389A/G   | 0.156                     | 0.135 | 0.459   | 0.156                     | 0.133 | 0.444        | 0.135                       | 0.133 | 0.986   |
|      | rs5227G/T     | 0.000                     | 0.000 | —       | 0.000                     | 0.000 | —            | 0.000                       | 0.000 | —       |
|      | rs35640285G/T | 0.000                     | 0.000 | —       | 0.000                     | 0.000 | —            | 0.000                       | 0.000 | —       |
| NPPA | rs61757273G/T | 0.091                     | 0.095 | 0.871   | 0.091                     | 0.065 | 0.296        | 0.095                       | 0.065 | 0.161   |
|      | rs198373A/G   | 0.000                     | 0.000 | —       | 0.000                     | 0.010 | —            | 0.000                       | 0.010 | —       |
|      | rs198372G/A   | 0.000                     | 0.000 | —       | 0.000                     | 0.010 | —            | 0.000                       | 0.010 | —       |
|      | rs5063G/A     | 0.076                     | 0.111 | 0.578   | 0.076                     | 0.090 | 0.802        | 0.111                       | 0.090 | 0.397   |
|      | rs5065T/C     | 0.030                     | 0.008 | 0.102   | 0.030                     | 0.004 | <b>0.020</b> | 0.008                       | 0.004 | 0.410   |
|      | rs5067A/G     | 0.030                     | 0.008 | 0.101   | 0.030                     | 0.004 | <b>0.020</b> | 0.008                       | 0.004 | 0.413   |

Bold value indicates the statistical significance of  $P < 0.05$ .

p-Values of additive model were obtained by logistic analysis adjusted for age, sex, and histories of hypertension and diabetes mellitus as covariables.

CE, cardioembolism; LAA, large-artery atherosclerosis; SVO, small-vessel occlusion.

SUPPLEMENTARY TABLE S3. *IN SILICO* ANALYSIS FOR POTENTIAL TRANSCRIPTIONAL REGULATION AT rs198372G/A (OR C/T) IN NPPA

| SNP                  | Position         | Allele   | Binding factor | Signal sequence |
|----------------------|------------------|----------|----------------|-----------------|
| rs198372G/A (or C/T) | Promoter of NPPA | G (or C) | ACF            | AACCAAT         |
|                      |                  |          | alpha-CBF      | CCAAT           |
|                      |                  |          | alpha-IRP      | CCAAT           |
|                      |                  |          | CDP            | CCAAT           |
|                      |                  |          | CP1            | CCAAT           |
|                      |                  |          | CP2            | CCAAT           |
|                      |                  |          | H1TF2          | CCAAT           |
|                      |                  |          | NF-1           | CCAAT           |
|                      |                  |          | NF-E           | CCAAT           |
|                      |                  |          | SRF            | CCAAT           |
| A (or T)             | Pit-1            | ATCAATA  |                |                 |

Signal sequences for transcriptional binding factors are predicted using the Signal Scan program ([www.bimas.cit.nih.gov/molbio/signal/](http://www.bimas.cit.nih.gov/molbio/signal/)).

Bold and underline indicates the complementary nucleotide (C and T) for major and minor (G and A) allele of rs198372 polymorphism, respectively.
